# Supplementary material for: Optimizing soil health through activated acacia biochar under varying irrigation regimes and cultivars for sustainable wheat cultivation
Source: PeerJ. 2025 Jan 17;13:e18748. doi: 10.7717/peerj.18748 (PMC11745133; doi:10.7717/peerj.18748)
Supplement: Supplemental Information 2 [file peerj-13-18748-s002.xlsx]

## Sheet: Sheet1
Treatment	PHt	SL	RL	NOL	NOT	RWC	MSI	Chla	Chlb	CAR	PRO	CAT	POD	SOD	SSug	MDA	GDW	GPS	GPP	SPP	TGW	SpPS	LDW	SDW	RDW	YPH	AWP	Pro	LFW	SFW	RFW
B0D0V1	114.133	13.5	15.8	27.6667	3.66667	68.6933	12.7367	0.271767	0.251933	0.455367	1.32333	0.0337	0.480267	0.2132	0.311433	0.392633	12.6067	68.6667	343.333	5	54.3833	21.6667	0.948333	11.3083	1.75167	6281.96	32.9233	3.93943	5.13667	16.3033	4.84333
B0D1V1	108.767	11.5	19.4	22.6667	3.33333	50.7433	11.8533	0.441633	0.5206	1.1022	1.4649	0.0393	0.351467	0.0671667	0.2396	0.561667	10.26	65	239	3.66667	52.7333	19	0.406667	15.0767	2.705	4232.38	22.1833	4.76917	5.14667	22.67	7.32
B0D2V1	109.3	11.6	17.9333	25.6667	3.33333	66.8867	20.6867	0.646	0.930433	0.3586	1.42243	0.0186	0.333267	0.0989667	0.274133	0.423767	8.76667	64	276.667	4.33333	52.04	20	0.73	11.335	3.66	4833.2	25.3333	4.15677	6.13	12.08	3.50333
B0D3V1	112.8	12.1333	14.6	23.3333	3.66667	56.08	14.2	0.229233	0.193433	0.8491	1.40683	0.0381333	0.311233	0.121633	0.218867	0.400833	8.74667	64	213.333	3.33333	49.6467	20	0.923333	6.58167	1.23667	3558.63	23.3133	3.97717	4.53333	29.38	4.72
B0D4V1	102.7	11.7	14.0667	18.6667	4.33333	47.3233	13.7667	0.418267	0.444967	1.37723	1.40183	0.0440667	0.7966	0.2431	0.192133	0.673233	6.58333	62.6667	209	3.33333	48.7067	16.6667	0.27	8.74267	2.07667	3435.24	22.5067	5.0813	2.51	9.48667	5.73667
B0D0V2	102.533	9.9	13.2667	22.3333	3.66667	59.7667	16.6367	0.5522	0.8098	0.8648	1.11793	0.0240333	0.3189	0.116667	0.1746	0.435867	6.32667	61.3333	245.333	4	46.6667	18	0.653333	6.44167	2.86833	3854.21	25.25	4.29487	3.65333	18.5167	2.41333
B0D1V2	110.033	15.1667	12.9333	20.3333	3	49.85	12.0733	0.174767	0.137467	1.28427	1.4052	0.0496667	0.480967	0.126567	0.1476	0.406267	7.73333	60.3333	120.667	2	45.4433	19	0.883333	5.55	1.03833	1844.19	13.81	3.99897	3.47667	16.6133	3.45
B0D2V2	100.867	10.4667	10.9333	17	3	41.4933	10.5733	0.366	0.3782	1.55217	1.4982	0.0521	0.556667	0.215567	0.165467	0.7778	5.55	59.6667	139.667	2.33333	41.35	15.6667	0.233333	7.73433	1.725	1949.5	14.5933	5.67517	2.16333	9.11667	1.64667
B0D3V2	95.3333	9.63333	10.9333	19.3333	4.33333	48.2433	17.1933	0.5049	0.7022	1.05727	1.59383	0.0228333	0.252633	0.0543	0.1506	0.470567	5.17	57	171	3	42.4467	16	0.603333	5.78667	0.91	2442.2	18.2867	4.5295	2.05	15.5833	2.01
B0D4V2	104.4	11.2	10.2667	17.3333	2.66667	51.5	13.3333	0.0729	0.098	1.49853	1.50167	0.0541	0.294333	0.0687333	0.1649	0.411467	7.12667	58.3333	116.667	2	42.4867	16.6667	0.853333	5.09333	0.7	1667.37	14.5633	4.0172	2.97333	14.7567	2.43667
B0D0V3	98.2333	10.3333	9.03333	13	3	62.26	19.7433	0.330767	0.341967	1.64397	1.27043	0.059	0.559633	0.17	0.155733	1.01303	5.09667	55.6667	111.333	2	39.27	14.3333	0.22	7.12533	1.21833	1469.95	12.84	6.37383	1.72	12.7433	1.34
B0D1V3	92.1333	9.86667	8.6	16.3333	3.33333	50.0433	21.9967	0.4714	0.6369	1.67743	1.5209	0.0252333	0.3124	0.0781	0.184667	0.490367	4.28333	52.3333	157	3	39.31	14	0.54	4.28167	0.583333	2075.65	18.13	4.6561	1.52667	9.56667	1.52333
B0D2V3	95.6	11.7667	6.5	13	3	55.83	12.9067	0.0407	0.0398667	1.65177	1.356	0.0667	0.2836	0.0945333	0.189167	0.419767	5.60333	56	112	2	39.8867	16.3333	0.83	3.10667	0.46	1502.63	15.75	4.0961	2.05	12.25	1.29
B0D3V3	92.2	11.2333	6.30667	12	4	78.48	22.47	0.291633	0.291067	1.87003	1.29617	0.0734667	0.7478	0.210233	0.1983	1.4862	3.11	52.6667	70	1.33333	37.0667	13	0.13	5.96933	0.645	874.193	9.16	7.94787	1.44333	8.4	0.553333
B0D4V3	89.4667	9.16667	6.3	12	4	53.18	23.3667	0.4545	0.577033	1.8583	1.42333	0.0325333	0.295733	0.0776	0.181033	0.504033	3.36667	51	102	2	35.0267	12.6667	0.476667	3.36333	0.276667	1201.3	12.59	4.71323	1.26667	7.53333	0.923333
B1D0V1	118.133	14.5	14.3	29.3333	2.66667	45.4933	18.3733	1.64163	1.7306	0.824567	2.1542	0.0407667	0.677467	0.184767	0.335067	0.227767	14.79	59.3333	356	6	56.4167	21.6667	1.84167	10.8633	2.41833	6752.7	35.39	3.38007	6.95667	22.9367	4.92333
B1D1V1	110.1	12.5	14.1667	25.3333	5.33333	79.8067	12.8333	1.17853	1.1808	1.0452	2.64377	0.0473333	0.4455	0.1481	0.277967	0.335433	11.12	57	285	5	51.0467	20.3333	1.23167	14.9783	2.63167	4893.63	25.6467	3.7884	4.07667	15.0367	5.23667
B1D2V1	111	12.6	13.9667	27.6667	3.33333	73.0933	24.89	1.46803	1.3661	1.36563	2.54617	0.0515	0.603033	0.188433	0.2843	0.2827	9.15333	63.6667	254.667	4	52.9767	20.3333	1.33667	8.765	2.61833	4539.22	23.7933	3.63743	3.49	17.9833	4.69333
B1D3V1	115.133	13.1333	13.5333	25	2.66667	65.7433	13.6967	1.62633	1.59927	0.991633	2.15667	0.0577667	0.640167	0.173167	0.313967	0.230333	10.6633	56.3333	281.667	5	50.5767	19.3333	1.715	7.90833	2.22667	5250.02	34.3967	3.41893	3.28667	16.4667	3.24667
B1D4V1	103.6	12.7	11.7333	20.6667	3	67.1367	13.2033	1.12343	1.14253	1.5	2.69237	0.0544	0.0694	0.0179333	0.2357	0.342967	7.80667	66.6667	245	3.66667	48.6867	18	1.21333	10.6617	2.15833	4015.42	26.3033	3.80637	2.17333	12.9567	3.46333
B1D0V2	104.1	10.9	12.4333	24	3.33333	49.11	23.74	1.4162	1.3262	1.64107	2.67243	0.0610667	0.687967	0.1945	0.293333	0.291633	6.77333	53	159	3	49.1933	18.6667	1.48667	6.65167	1.73167	2630.6	17.2367	3.668	2.18	12.9333	4.01333
B1D1V2	111.567	16.1667	11.6333	23.6667	4	70.68	12.53	1.59553	1.50577	1.3198	2.61787	0.0624	0.847733	0.2826	0.286833	0.244733	8.72	72.6667	314.667	4.33333	51.85	21	1.64167	6.15167	1.9	5495.32	41.1467	3.46517	5.19333	28.1667	4.18333
B1D2V2	101.5	11.4667	10.3667	18.3333	2.66667	59.42	16.0067	1.09563	1.10747	1.7391	2.69377	0.0736667	0.9232	0.307733	0.2209	0.3469	6.15667	62	248	4	50.42	21	1.07667	8.71667	1.49	4205.93	31.4933	3.8261	2.91	10.9033	2.65
B1D3V2	101.467	10.6333	11.1	20.6667	4.66667	48.0567	18.6933	1.29633	1.3162	1.83807	3.61793	0.0708	0.617967	0.1446	0.270433	0.313367	5.79	57.6667	230.667	4	50.41	22	1.43333	5.165	1.325	3911.73	29.29	3.6995	1.74333	12.4233	4.02667
B1D4V2	108.467	12.2	10.5	19	4.33333	61.0833	17.9733	1.51807	1.47697	1.60903	3.15723	0.0833667	0.7132	0.268467	0.255	0.2574	7.68	67	223.333	3.33333	49.5533	18	1.63333	5.38167	1.49	3722.99	32.52	3.5208	3.63	13.9867	1.77667
B1D0V3	100.3	11.3333	8.7	16	3.33333	48.2467	25.15	1.05687	1.0706	1.79817	2.7482	0.0716667	0.785333	0.283633	0.2986	0.359133	5.38333	58	174	3	47.0367	17	1.022	7.67833	1.08	2751.09	24.03	3.8423	1.84333	8.29333	1.93
B1D1V3	96.5	10.8667	8.9	17.3333	4	48.71	21.0767	1.25793	1.2793	1.91893	3.2605	0.085	0.753833	0.228167	0.2833	0.3224	4.59667	55.6667	131	2.33333	45.5867	17.3333	1.40333	4.59333	0.99	2015.38	17.6067	3.72923	1.50667	10.77	3.27333
B1D2V3	103.967	12.7667	9	15.3333	3	59.0633	18.8667	1.49413	1.40697	1.93057	3.92403	0.0916333	0.567633	0.1892	0.247633	0.2733	5.99	59.6667	139	2.33333	47.3333	17.3333	1.56	4.65833	1.23667	2210.19	23.1667	3.59323	4.49	14.1367	1.80333
B1D3V3	94.7667	12.2333	7.16667	14.3333	3.66667	57.1133	26.13	0.886233	1.00627	1.8847	2.52043	0.0860667	0.865333	0.225267	0.210067	0.377467	4.66	53.6667	125	2.33333	44.05	16	0.973333	5.81167	0.606667	1850.43	19.3967	3.8832	1.34667	11.2967	1.51333
B1D4V3	94.7	10.1667	6.76667	13	3.66667	48.8633	23.2967	1.23123	1.23467	2.01627	3.60423	0.152567	0.665967	0.1824	0.326033	0.3271	4.29	52	138.333	2.66667	41.0667	16.6667	1.36	4.06833	0.731667	1914.62	20.0667	3.7725	1.88667	10.5133	2.53667
B2D0V1	121.367	19.2333	15.3	34.6667	6	49.6533	24	2.66563	2.9287	1.45667	3.50667	0.1415	0.268567	0.0465	0.2963	0.108567	16.8333	70.3333	446	6.33333	61.49	23	4.06	10.5133	2.44333	9224.23	48.3467	2.6272	5.39	22.96	6.19667
B2D1V1	112.5	14.2333	15.7	28.3333	3	54.4733	22.7267	1.8214	1.90503	1.29257	3.43933	0.140867	0.851833	0.283933	0.278833	0.208133	11.31	65.6667	284.667	4.33333	53.1867	19.6667	2.10333	10.8367	3.09833	5100.76	26.7367	3.21077	4.04333	16.3933	5.3
B2D2V1	112.933	10.2	15.0333	30	4.33333	49.14	24.6267	2.04533	2.2342	1.09837	3.3795	0.0815667	0.141533	0.0338333	0.2761	0.173267	11.3367	63	251.667	4	50.6667	18	2.581	9.15	2.65	3151.2	16.5167	2.97403	4.39333	18.9933	3.99333
B2D3V1	118.267	17.7333	14.5333	28.6667	5.66667	52.1967	20.5633	2.44347	2.85937	1.7436	3.82333	0.1631	0.628967	0.1108	0.288133	0.133	11.1033	63.6667	233	3.66667	55.9533	19	2.96	7.90167	2.13167	4387.34	28.74	2.78823	4.47	19.0333	5.30333
B2D4V1	105.733	10.9333	13.5	21.6667	5	53.2433	22.7033	1.77653	1.88827	1.5267	2.7149	0.155733	1.69377	0.338767	0.290833	0.211667	8.00667	60.6667	182	3	48.58	18.3333	1.99	11.1033	2.76	2974.09	19.4833	3.19603	3.83667	14.3567	4.57333
B2D0V2	108.2	13.4	13.8333	22.6667	4.33333	46	23.1833	1.96223	2.12607	1.32203	3.50577	0.101333	1.0922	0.2551	0.306467	0.1876	7.28	55.6667	185	3.33333	47.2833	15.6667	2.49333	7.28	2.29833	4005.88	26.2467	3.00557	3.28	15.4333	3.69
B2D1V2	117.3	17.4667	12.6333	25	4.33333	45.84	25.2233	2.29507	2.73227	1.8317	3.90683	0.1903	0.8327	0.185433	0.3035	0.1409	9.32333	68.3333	341.667	5	56.3033	24.3333	2.83	6.58833	1.93833	6470.59	48.4467	2.88687	7.11667	25.7167	4.70667
B2D2V2	104.867	11.4333	12	20.6667	4	51.5367	21.8	1.73817	1.8589	1.7412	3.90183	0.163833	1.63223	0.408067	0.229367	0.213	6.59	61.6667	246.667	4	45.72	19.6667	1.96	9.32167	2.245	3793.55	28.4033	3.2493	3.43667	11.77	3.58667
B2D3V2	102.3	10.5	12.1	20.3333	4.66667	44	22.4367	1.9409	2.04737	1.44687	4.45127	0.121167	0.951333	0.202333	0.290933	0.191133	6.11	61	264.333	4.33333	44.9267	20	2.38833	6.11	1.955	3997.38	29.93	3.04117	3.17667	13.7167	4.09
B2D4V2	115.5	14	11.5	22	4.66667	53.94	26.2367	2.2037	2.43463	2.06037	3.9052	0.2941	0.910833	0.201933	0.312167	0.148033	8.66	62.6667	208.667	3.33333	50.2533	17	2.72667	6.09	1.62167	3520.51	30.7533	2.92693	5.01667	15.0767	3.40333
B2D0V3	103.967	11.6667	9.7	18.3333	3.33333	55.5833	21.86	1.71177	1.8134	2.12127	3.9982	0.1919	1.75807	0.5383	0.2844	0.2172	6.09333	57.6667	173	3	44.36	15.3333	1.94	8.66	1.70167	2581.64	22.55	3.28113	3.12	9.49	3.52667
B2D1V3	98.6667	10.7667	9.8	18.3333	3.66667	42.5667	21.7567	1.89093	1.98637	1.63597	3.67717	0.151333	0.764167	0.211833	0.310167	0.200633	5.57	53	141.667	2.66667	43.4367	16	2.20833	5.56833	1.765	2072.11	18.0967	3.06647	2.7	11.87	4.49667
B2D2V3	111.333	13.6667	10	16.6667	4.33333	56.6233	22.7033	2.11763	2.30253	2.3182	4.00167	0.479967	2.37393	0.5553	0.277167	0.158233	6.44	59.3333	178	3	47.92	19.3333	2.66333	5.19	1.40667	2868.83	30.0733	2.9552	3.87	14.8567	3.00667
B2D3V3	100.433	10.8333	7.56667	14	3.66667	51.6	20.41	1.67777	1.7796	2.34863	2.9371	0.213933	1.71263	0.4949	0.258133	0.2251	5.19333	53.3333	160.667	3	43.4733	15.6667	1.86	6.24833	1.50333	2352.63	24.6633	3.30883	4.48	13.6633	3.48333
B2D4V3	95.2667	9.56667	8.3	14.6667	3.66667	42.37	19.7333	1.83873	1.9442	1.9243	4.43757	0.2017	0.811967	0.265967	0.3054	0.205267	4.51	52	138.667	2.66667	42.1267	15	2.14	4.72833	1.56667	1966.47	20.6133	3.10503	2.68	12.5533	2.81333
